# Supplementary material
Source: PubMed Central journal article supplement (PMC4892793)
Supplement: rspb20160312supp1.pdf [file rspb20160312supp1.pdf]

## Electronic Supplementary Material (ESM)

### ESM.1) Colony resistance profile

We set up laboratory colonies with field caught *Bombus terrestris* queens from Neunforn, Switzerland in spring 2013. The resistance profile of thirty parasite-free colonies was determined by administering a "cocktail" infection to five workers per colony. The cocktail contained 2'000 parasite cells each of five genetically distinct *Crithidia bombi* strains (project tags: 08.068, 08.075, 08.091, 08.161, 08.192) in 10  $\mu$ l of 50% sugar water and was presented to the worker after a starvation period of 2h. Seven-days post infection [1,2] bees were frozen and DNA was extracted from dissected guts with Qiagen DNeasy Blood & Tissue Kit following the manufacturer's protocol.

Infection intensity was assessed by quantitative real-time PCR (see [3] for primers and cycling protocol). The total number of parasite cells in a sample was determined by absolute quantification using the standard curve method. For this, we extracted DNA from a known number of *C. bombi* cells to generate the standard curves. Each biological sample was run in triplicates in a total reaction volume of 10 $\mu$ l containing: 0.2 $\mu$ l [10 $\mu$ M] of each forward and reverse primer, 2 $\mu$ l of 5x HOT FIREPol® EvaGreen® qPCR Mix Plus (ROX) (Solis BioDyne) and 1 $\mu$ l DNA template.

Infection diversity was determined by genotyping the samples for three *C. bombi* microsatellite markers Cri4G9, Cri4 and Cri2F10 [4]. Microsatellite were amplified in one multiplexed reaction in a total reaction volume of 10 $\mu$ l containing: 2 $\mu$ l of 5x Colorless GoTaq® Reaction Buffer (Promega), 0.5 $\mu$ l of dNTPs [2.5mM each], 0.1 $\mu$ l (0.15 $\mu$ l Cri4G9) [10 $\mu$ M] of each forward and reverse primer, 0.05 $\mu$ l GoTaq DNA polymerase (Promega, 5U /  $\mu$ l) and 2 $\mu$ l DNA template. A total of 40 PCR cycles were performed with the following steps: denaturation (94°C, 30s), annealing (48°C, 30s) and extension (72°C, 30s). PCR products were run on a 3730xl DNA Analyzer (Applied Biosystems).

### ESM.2) Microbiota faecal transplant experiment

To transplant the microbiota, we followed the faecal transplant protocol by Koch and Schmid-Hempel [5] with a few modifications. Briefly, all materials used in the context of the microbiota transplant experiment were either autoclaved or washed in 80% alcohol before use. In order to raise germ-free workers (referred to as recipients), we removed and surface sterilized brood from each of the selected colonies by submerging the brood in a 3% bleach solution for 90s. Subsequently, the brood was placed, for each colony individually, in sterilized housing boxes.

Daily, newly emerged recipients were transferred into individual housing boxes and kept for 1-3 days before a faecal transplant was offered to them. Upon emergence, recipients were provided with ad libitum pollen (gamma-irradiated, LEONI Studer Hard AG, Switzerland, dose: 35.5kGy [6], kept frozen at -20° until use) and 50% sugar water (autoclaved).

Faeces used for the microbiota transplants were collected from workers (referred to as donors), which emerged and remained in their source colonies (i.e. naturally acquired their microbiota). A single transplant consisted of faeces collected from at least three source colony workers; faeces collected from different colonies were never mixed. A microbiota transplant consisted of 5 $\mu$ l faeces mixed with 10 $\mu$ l 50% sugar water and was offered to a recipient after a 30min starvation period. Once recipients were observed to have fed on the inoculum, they were put back in their housing boxes and kept for 18h before being snap frozen in liquid nitrogen and stored at -80°C. Any recipient bee that did not feed or only partially fed on the inoculum was excluded from the experiment.

**ESM.3) RNA and DNA extraction**

RNA and DNA were simultaneously extracted from whole abdomen. For this, we disrupted the abdomen with 0.5 g 1.4mm Zirconium Oxide beads in 1ml peqGold TriFast™ reagent (peQlab) at room temperature (Omni Bead Ruptor 24 Homogenizer). After a 10min centrifuging step (12'000g, at 4°C) 450µl of the supernatant was transferred to a new tube containing 50µl BCP (1-Bromo-3-chloropropane), mixed well, incubated for 10min at room temperature and then centrifuged for 10min (12'000 g, at 4°C). The result was a phase separation into three phases, an aqueous phase, an interphase and a phenol phase. For RNA extraction, 180µl of the upper aqueous phase was transferred into a RNase-free tube containing 225µl Isopropanol, vortexed for 5-10s, incubated for 10min at room temperature and centrifuged for 10min (17'785g, 4°C). The supernatant was carefully discarded and 300µl 75% EtOH (prepared with DEPC treated H<sub>2</sub>O) was added, vortexed and centrifuged for 5min (17'785g). To improve RNA quality, this washing step was repeated. Finally, the supernatant was removed and the pellet was allowed to air dry for 3-5min before RNA was resolved in 50µl DEPC treated H<sub>2</sub>O and stored at -80 °C. Samples were extracted in four randomly selected extraction batches.

For DNA extraction 100µl of the phenol phase was removed and discarded before 300µl 100% EtOH was added to the sample, vortexed, incubated at room temperature for 5min and centrifuged for 15min (17'785g, 4°C) to precipitate DNA. The supernatant was discarded, and the DNA pellet was washed in 200µl 100% EtOH and centrifuged for 5min (17'785g, 4°C) before the supernatant was carefully discarded. The pellet was resuspended in 50µl H<sub>2</sub>O and incubated for 1h at 56°C. Following the incubation period, 150µl PBS were added before DNA was extracted with Qiagen DNeasy Blood & Tissue Kit following manufacturer's protocol, however the final elution volume was reduced to 70µl.

**ESM.4) Gene expression protocol**

DNA quality and purity was checked for 12 randomly selected samples on a 2100 Bioanalyzer (Agilent Technologies) with the RNA 600 Nano Kit and all samples were quantified and normalized based on Nanodrop 8000 (ThermoScientific) measurements. Even though no genomic DNA contamination was indicated, we used the Turbo DNA-free kit (Ambion) to purify 1.52µg RNA before reverse transcribing 0.5µg RNA using the QuatiTec® Reverse Transcription Kit (Qiagen). Manufactures protocol (Advanced Development Protocol 14, PN 100-1208B) was followed to measure gene expression with a Fluidigm 96.96 dynamic array IFCs (BioMark) using EvaGreen DNA Binding Dye (Biotium) as a reporter.

Each biological sample was run in triplicates for 31 genes (ESM Table S1). Samples with a Ct standard deviation >0.2 were checked for quantification outliers among the technical replicates. The technical replicate with the largest deviation to the mean was excluded given three replicates (i.e. no failed quantification) otherwise all measurements were retained.

The most stable combination of housekeeping genes was identified by the geNorm algorithm within qbase+ (Biogazelle). Thus, we excluded the housekeeping gene PLA2 (M = 0.909, CV = 0.284) and used the arithmetic mean of the measured Ct values for the genes ef1α (M = 0.556, CV = 0.184) and RPL13 (M = 0.556, CV = 0.204) as the normalization factor within samples [7]. Measurements from transplants of the same donor-recipient colony combinations were averaged (ESM Fig. S1B). Every recipient colony received transplants from both donor phenotypes; as well as every donor colony was transplanted into both recipient phenotypes (ESM Fig. S1A).

**ESM Table S1: Genes and primers used for the quantification of the expression response.**

| Functional gene Class | Gene               | Putative gene function (pathway)                     | NCBI accession                | Forward primer           | Reverse primer           | Product length | Primer ref. |
|-----------------------|--------------------|------------------------------------------------------|-------------------------------|--------------------------|--------------------------|----------------|-------------|
| Recognition           | BGRP1              | Recognition receptor (Toll)                          | XM_003397996                  | AACGTGGAAGTCAAAGATGG     | GCGAACGATGACTTGGTATT     | 206            | [1]         |
|                       | BGRP2              | Recognition receptor (Toll)                          | XM_003394713                  | TAACCTCCCTTTGGAAACACG    | GGCGGTAAAATACTGAACGA     | 249            | [1]         |
|                       | Dome               | Recognition receptor (JAK/STAT)                      | XM_012310386                  | AAAGCCGTTCACTCTAAGCA     | GACTTGCGAAAGAAGAAACG     | 116            |             |
|                       | Hemomucin          | Surface glycoprotein, potential recognition receptor | XR_131963                     | AGCATTCACAGATTTAGCACT    | TAACAGTTGATTTCCGAGGTA    | 173            | [2]         |
|                       | PGRP-LC            | Recognition receptor (Imd)                           | XM_003396463                  | CAGCCACCTACGACAGATTT     | GTACATTCGCTTGTGTCTT      | 101            | [1]         |
|                       | PGRP-S3            | Recognition receptor (Toll)                          | XM_003401893                  | CGTGAAGGAGCTCATACCAT     | CCAGGACTCATAGTGGCTGT     | 200            | [1]         |
|                       | Toll-1             | Recognition receptor (Toll)                          | XM_012307988                  | CGAATGGAGTTTAGAGCAGC     | ATTTATCCAGAACCAAGGG      | 172            |             |
| Signaling             | Basket             | Signal molecule (JNK)                                | XM_003402794                  | GGAACAAGATAATCGAGCAACTG  | CTGGCTTCAATCGGTTGTG      | 177            | [1]         |
|                       | Hopscotch          | Signal molecule (JAK/STAT)                           | XM_003401903                  | CACAGACTGAAGCAGGTTGA     | CATATGGGTAATTTGGTGCC     | 353            | [1]         |
|                       | MyD88              | Signal molecule (Toll)                               | XM_003394153                  | GCATTAGGCATTGACAAACGAC   | CAGAAGTCATACAAACCCACTCTG | 125            |             |
|                       | Relish             | Signal molecule (Imd)                                | XM_003399472                  | CAGCAGTAAAAATCCCGAC      | CAGCACGAATAAGTGAACATA    | 156            | [2]         |
| Effectors             | Abaecin            | Antimicrobial peptide                                | XM_003394653                  | GCCACAATATGTGGAATCCT     | ATGACCAGGGTTTGGTAATG     | 141            | [1]         |
|                       | Apidaecin          | Antimicrobial peptide                                | XM_003402966                  | CCCGACTAATGTACTTGCCA     | GAAGGTGCGAATGTGTGGA      | 131            | [1]         |
|                       | Defensin           | Antimicrobial peptide                                | XM_003395924                  | GTCTGCCTTTGTGCGAAGAC     | GACATTAGTCGCGTCTTCTTCG   | 139            | [1]         |
|                       | Ferritin           | Iron transportation                                  | XM_003393332                  | AAAGAATTGGACGCAAATGG     | CAGCGAAGTATGTTCCAAGA     | 259            | [1]         |
|                       | Hymenoptaecin      | Antimicrobial peptide                                | XR_132450                     | TTCATCGTACTGGCTCTCTTCTG  | AGCCGTAGTATTCTCCACAGC    | 85             | [1]         |
|                       | Lysozyme3          | Bacteriolytic effector                               | XM_003394052                  | TATGGGCAAGAAGATTTCGAC    | GTGTACATCGTTCACGCATC     | 219            | [1]         |
|                       | TEPA               | Effector molecule (JAK/STAT)                         | XM_003399699                  | GCGTTCATGACCACCTGTT      | TACAGGTTACTCCACAGCCC     | 212            | [1]         |
|                       | Transferrin        | Iron-binding, antibacterial                          | XM_003401163                  | CAATTTCCTCACCCGATCCT     | CCTCGTATTGCGCTTGCAT      | 131            | [1]         |
| Metabolism            | Apolipoprotein III | Lipid transport                                      | XM_003402572                  | ATCAGGCTCAAACGAACATC     | TTCTGTTCACTTGTGCTGAG     | 269            | [3]         |
|                       | CYP4G11            | Stress response                                      | XM_003399563                  | GAATGCGCAAAGAAGGTAGC     | CGCTTCCGCTCTTGTAAATC     | 313            | [3]         |
|                       | Vitellogenin       | Metabolic, endocrinological                          | XM_003402655/<br>XM_003402656 | GTGACAAGCGAAGAGACTATTATG | CCGTGTTATCTGGCGTGAC      | 154            | [4]         |
| ROS                   | Jafrac             | Peroxiredoxin, ROS regulation                        | XM_003401245                  | CTCACTTCAGTCACTTGGA      | GCCAGCAGGACATACTTCTC     | 290            | [1]         |
|                       | Peroxiredoxin5     | Peroxiredoxin, ROS regulation                        | XM_003394777                  | TCACACCAGGATGTTCCAAGAC   | TTCTGCTCCGTGTTCTTACCC    | 146            | [1]         |
| Melanisation          | Catsup             | Enzyme, melanin synthesis                            | XM_003398173                  | TTACCATGACGAGTCACCAA     | ATGAGGAACCAAAGCATGAG     | 355            | [1]         |
|                       | PPO                | Prophenoloxidase, melanin synthesis                  | HM142999                      | AGCGGCATAATACGTTGTGT     | CCGAGGGATAGAAAGTCTCC     | 329            | [3]         |
|                       | Punch              | Enzyme, melanin synthesis                            | XM_012320347                  | ATTGCCAGGACACTTTCAAC     | TACAAGCTGGAAACGGAAAC     | 212            | [1]         |
|                       | Serpin27a          | Serine protease inhibition (PPO)                     | XM_003392985                  | CCGATCATCCATTGCTATTC     | ACCTGCACTGATATCCCTG      | 164            | [1]         |
| Housekeeping          | ef1 $\alpha$       | Elongation factor 1 $\alpha$                         | XM_003401944                  | GCTGGTGACTCGAAGAACAATC   | GGGTGGTTCAACACAATAACCTG  | 74             | [3]         |
|                       | PLA2               | Phospholipase A2                                     | FN391388                      | TATCTTCAATGCCCAGGAG      | GTCGTAACAAATGTCATGCG     | 129            | [5]         |
|                       | RPL13              | Ribosomal protein L13                                | FN391387                      | GGTTAACCAGCCAGCTAGAAA    | CTTCACAGGTTTGGTGCAA      | 83             | [5]         |

<sup>1</sup>Primers with no reference were designed with either Primer3 [6] or Quantprime [7] with the following specifics: primer length 20 $\pm$ 2bp; melting temperature 60 $\pm$ 1 $^{\circ}$ C with a maximum temperature difference between forward and reverse primer of 0.5 $^{\circ}$ C. Primers were evaluated with an annealing temperature of 60 $^{\circ}$ C and found to be specific with an amplification efficiency of 1.9 - 2.1.

- Brunner, F. S., Schmid-Hempel, P. & Barribeau, S. M. 2013 Immune Gene Expression in *Bombus terrestris*: Signatures of Infection Despite Strong Variation among Populations, Colonies, and Sister Workers. *PLoS One* **8**, e68181. (doi:10.1371/journal.pone.0068181)
- Schlüns, H., Ben M Sadd, Schmid-Hempel, P. & Crozier, R. H. 2010 Infection with the trypanosome *Crithidia bombi* and expression of immune-related genes in the bumblebee *Bombus terrestris*. *Dev Comp Immunol* **34**, 705–709. (doi:10.1016/j.dci.2010.02.002)
- Barribeau, S. M. & Schmid-Hempel, P. 2013 Qualitatively different immune response of the bumblebee host, *Bombus terrestris*, to infection by different genotypes of the trypanosome gut parasite, *Crithidia bombi*. *Infect Genet Evol* **20**, 249–256. (doi:10.1016/j.meegid.2013.09.014)
- Li, J., Huang, J., Cai, W., Zhao, Z., Peng, W. & Wu, J. 2009 The vitellogenin of the bumblebee, *Bombus hypocrita*: studies on structural analysis of the cDNA and expression of the mRNA. *J Comp Physiol B* **180**, 161–170. (doi:10.1007/s00360-009-0434-5)
- Hornáková, D., Matoušková, P., Kindl, J., Valterová, I. & Pichová, I. 2010 Selection of reference genes for real-time polymerase chain reaction analysis in tissues from *Bombus terrestris* and *Bombus lucorum* of different ages. *Anal Biochem* **397**, 118–120. (doi:10.1016/j.ab.2009.09.019)
- Rozen, S. & Skaletsky, H. 1999 Primer3 on the WWW for General Users and for Biologist Programmers. In *Bioinformatics Methods and Protocols*, pp. 365–386. New Jersey: Humana Press. (doi:10.1385/1-59259-192-2:365)
- Arvidsson, S., Kwasniewski, M., Riaño-Pachón, D. M. & Mueller-Roeber, B. 2007 QuantPrime—a flexible tool for reliable high-throughput primer design for quantitative PCR. *BMC Bioinformatics* **9**, 465–465. (doi:10.1186/1471-2105-9-465)



**ESM Table S3: Percentage of correctly classified cases of the cross-validation of the linear discriminant function for each functional gene class.**

|                          |             | Recipient effect              |                                 | Donor effect                  |                                 |
|--------------------------|-------------|-------------------------------|---------------------------------|-------------------------------|---------------------------------|
|                          |             | Predicted phenotype resistant | Predicted phenotype susceptible | Predicted phenotype resistant | Predicted phenotype susceptible |
| <b>Melanisation</b>      |             |                               |                                 |                               |                                 |
| True phenotype           | Resistant   | 54.55                         | 45.45                           | 81.82                         | 18.18                           |
|                          | Susceptible | 37.50                         | 62.50                           | 22.22                         | 77.78                           |
| Proportions <sup>1</sup> |             | 40.74                         | 59.26                           | 37.93                         | 62.07                           |
| <b>Effectors</b>         |             |                               |                                 |                               |                                 |
| True phenotype           | Resistant   | 81.82                         | 18.18                           | 58.33                         | 41.67                           |
|                          | Susceptible | 22.22                         | 77.78                           | 38.89                         | 61.11                           |
| Proportions <sup>1</sup> |             | 37.93                         | 62.07                           | 40.00                         | 60.00                           |
| <b>Recognition</b>       |             |                               |                                 |                               |                                 |
| True phenotype           | Resistant   | 63.64                         | 36.36                           | 66.67                         | 33.33                           |
|                          | Susceptible | 33.33                         | 66.67                           | 33.33                         | 66.67                           |
| Proportions <sup>1</sup> |             | 37.93                         | 62.07                           | 40.00                         | 60.00                           |
| <b>Metabolism</b>        |             |                               |                                 |                               |                                 |
| True phenotype           | Resistant   | 0                             | 100                             | 38.46                         | 61.54                           |
|                          | Susceptible | 72.22                         | 27.78                           | 22.22                         | 77.78                           |
| Proportions <sup>1</sup> |             | 41.94                         | 58.06                           | 41.94                         | 58.06                           |
| <b>ROS</b>               |             |                               |                                 |                               |                                 |
| True phenotype           | Resistant   | 27.27                         | 72.73                           | 83.33                         | 16.67                           |
|                          | Susceptible | 50.00                         | 50.00                           | 27.78                         | 72.22                           |
| Proportions <sup>1</sup> |             | 37.93                         | 62.07                           | 40.00                         | 60.00                           |
| <b>Signaling</b>         |             |                               |                                 |                               |                                 |
| True phenotype           | Resistant   | 36.36                         | 63.64                           | 63.64                         | 36.36                           |
|                          | Susceptible | 56.25                         | 43.75                           | 27.78                         | 72.22                           |
| Proportions <sup>1</sup> |             | 40.74                         | 59.26                           | 37.93                         | 62.07                           |

<sup>1</sup>Proportions gives percentage of phenotypes in the data set. Proportions vary for some gene classes due to gene expression failure for some samples and genes. However note, the prior classification probability for the cross-validation of the linear discriminant function was set to 0.5.

**ESM Table S4: Partial correlation coefficient of linear discriminant functions for either recipient or donor phenotypes.**

|                     | Recipient phenotype | Donor phenotype |
|---------------------|---------------------|-----------------|
| <b>Melanisation</b> |                     |                 |
| Catsup              | 4.130598            | -5.824617       |
| PPO                 | 7.484474            | 1.427122        |
| Punch               | -2.967775           | -1.082558       |
| Serpin27a           | -28.734568          | 2.721916        |
| <b>ROS</b>          |                     |                 |
| Jafrac              | -1.293329           | -2.512490       |
| Peroxiredoxin5      | 8.873714            | 5.542687        |
| <b>Metabolism</b>   |                     |                 |
| Apolipoporphin.III  | -0.4304080          | -0.3563731      |
| CYP4G11             | 0.0173596           | -0.1947528      |
| Vitellogenin        | 0.3259856           | 0.7014135       |
| <b>Effectors</b>    |                     |                 |
| Abaecin             | -0.1818116          | 0.1281196       |
| Ferritin            | -0.3394093          | -1.7669270      |
| Apidaecin           | -1.3002121          | 1.2680009       |
| Defensin            | 0.2550820           | -0.5152214      |
| Hymenoptaecin       | -0.5381095          | -0.2040488      |
| TEPA                | 99.8821058          | 32.3809248      |
| Lysozyme3           | -1.8080832          | -0.8738062      |
| Transferrin         | 0.8915005           | 1.4742006       |
| <b>Signalling</b>   |                     |                 |
| Basket              | -50.42431           | -14.78089       |
| MyD88               | 50.35166            | -16.51957       |
| Hopscotch           | 73.90705            | -73.37020       |
| Relisch             | -196.73343          | 471.90052       |
| <b>Recognition</b>  |                     |                 |
| PGRP-S3             | -11.928997          | 20.5579004      |
| BGRP1               | -3.574761           | -1.4058511      |
| BGRP2               | -16.837104          | -12.6516326     |
| Dome                | -1.135818           | 6.5397240       |
| PGRP-S3             | 6.236538            | -1.6064176      |
| Toll-1              | -11.435283          | 1.4474364       |
| Hemomucin           | 9.321592            | 0.7595999       |

**ESM Table S5: MANOVA results for all gene classes and summary of linear discriminant analysis (LDA) with outliers excluded.**

| Functional gene class      | Factor <sup>a</sup> | Df, Residuals | Pillai | Approx F | Num Df, Den Df | P-value | LDA accuracy <sup>b</sup> | Two genes with highest coefficient  |
|----------------------------|---------------------|---------------|--------|----------|----------------|---------|---------------------------|-------------------------------------|
| Recognition (-10 outliers) | Recipient phenotype | 1,18          | 0.641  | 3.062    | 7,12           | 0.043   | 60.00%                    | PGRP-LC, dome                       |
| Signalling (-6 outliers)   | Donor phenotype     | 1,22          | 0.435  | 3.653    | 4,19           | 0.023   | 73.91%                    | Relish, hopscotch                   |
| Effectors (-10 outliers)   | Recipient phenotype | 1,16          | 0.786  | 4.584    | 8,10           | 0.014   | 90.91%                    | TEPA, defensin                      |
| Metabolism (-5 outliers)   | Donor phenotype     | 1,24          | 0.261  | 2.583    | 3,22           | 0.079   | 69.23%                    | Vitellogenin, apolipoprotein III    |
| ROS (-3 outliers)          | Donor phenotype     | 1,25          | 0.334  | 6.019    | 2,24           | 0.008   | 74.07%                    | Peroxisome oxidoreductase 5, jafrac |
| Melanisation (-6 outliers) | Recipient phenotype | 1,22          | 0.471  | 4.007    | 4,18           | 0.017   | 95.65%                    | Serpin27a, PPO                      |
|                            | Donor phenotype     | 1,22          | 0.528  | 5.036    | 4,18           | 0.007   | 69.57%                    | Catapult, punch                     |

<sup>1</sup>Statistics of the minimal model (i.e. retaining only independent variables with a p-value  $\leq 0.1$ ) for the MANOVA results are reported.

<sup>2</sup>Summary values for LDA classification function are given (i.e. accuracy), as well as the two genes contributing most to the discriminant function.

**ESM.6) 16S amplicon library preparation and sequencing**

We generated a multiplexed 16S amplicon paired-end library for sequencing on the MiSeq® Illumina platform in order to investigate microbial gut communities of recipients that received a microbiota transplant. We amplified the variable region V3-V4 of the 16S rRNA gene with universal primers [10,11] (ESM Table S2). Primers were designed after principles described in [12]. We thus had three primer pairs containing frameshifting nucleotides between the region-specific part and the Illumina overhang adapter in order to increase general sequence diversity in the generated 16S amplicon libraries (ESM Table S2). We followed the manufacturer's suggested two-step amplification workflow.

Thus an initial PCR was set up for each sample and each primer pair as followed: 1.5µl [10µM] forward and reverse primer mix, 12.5µl 2 x KAPA HiFi Hot Start Ready Mix and 2µl DNA template in a total reaction volume of 25µl. The cycling protocol used a 5min initial degradation step at 95°C, followed by 22 cycles of 98°C for 20s, 58°C for 15s and 72°C for 15s and finished with a final elongation step for 5min at 72°C. All four independent PCR reaction products were pooled and purified using Agencourt AMPure XP beads (Beckman Colter) with a ratio of 0.8:1 (beads to PCR product) and eluted in 30µl [10mM] Tris-Buffer.

A second limited-cycle PCR was performed in order to attach indices and sequencing adapters to the template libraries. A total reaction volume of 50µl contained 10µl of the purified PCR product, 25µl 2x KAPA HiFi Hot Start Ready Mix and 5µl of each forward and reverse primers of the Nextera® XT Index Kit v2 Set A (Illumina). The indexing cycle protocol used a 3min initial denaturation step at 95°C followed by 10 cycles of 30s at 95°C, 30s at 55°C and 30s at 72°C and 5min final extension step at 72°C. The indexed amplicon libraries were purified using Agencourt AMPure XP beads (Beckman Colter) with a ration of 1:1 (beads to amplicon product) and eluted in 30µl [10nM] TrisBuffer.

Amplicon library quality and library fragment size were checked for 10 randomly selected samples on a Bioanalyzer (Aliigent Technologies) DNA HS 1000 chip. All libraries were 1:10'000 diluted and quantified in duplicates by quantitative PCR using the 2 x KAPA SYBER qPCR Ready Mix on an ABI 7500 Real-time PCR System (Applied Biosystems). We used the Library Quant Illumina Kit (KAPA Biosystems) with quantification standards ranging from 0.002pM to 20pM for absolute quantification. Following quantification, equimolar amounts of all libraries were pooled. The final, multiplexed pool was quantified by qPCR as previously described. We followed the manufacturer's manual (Preparing Libraries for Sequencing on the MiSeq® #15039740 Rev. D) to prepare the library for paired-end sequencing. We loaded a final library concentration of 17.5pM and a 15% PhiX spike-in with MiSeq® Reagent Kit v3.

**ESM.7) Amplicon processing and OTU clustering**

A total of 18,122,556 paired-end raw reads were generated in a single 600-cycle MiSeq run. Qualities of reads were checked with FastGQ (v0.11.2). 96% (17,432,405) of the paired reads successfully merged using FLASH (v1.2.9) with the following specifications: minimum overlap of 15bp, maximum overlap of 250bp and maximum mismatch density of 0.25. Primer sequences were trimmed from the merged reads using cutadapt (v1.5) requiring a full-length error-free overlap but allowing wildcards.

Merged and primer trimmed reads were quality filtered with PRINSEQ-lite (v0.20.4) and 13,878,054 reads (76.6%) passed filtering, given a fragment range of 350-550bp, GC range of 20-80 and a minimum quality mean of 30, and allowing no ambiguous nucleotides.

OTU clustering was performed with the pooled merged and trimmed reads using UPARSE-OTU algorithm (usearch v7.0.1090\_i86linux64) [13,14]. For this the dataset was sorted (sortbylength), de-replicated (derep\_fulllength), abundance sorted (sortbysize; size = 2), and clustered (cluster\_otus, minimum identity = 97%).



**ESM Table S2: Amplicon Primer to generate V3-V4 16S template library.**

| Primer Name | Sequence 5' - 3'                                          |
|-------------|-----------------------------------------------------------|
| U341F_nex0  | tcgtcggcagcgtcagatgtgtataagagacagCCTACGGGDGGCWGCA         |
| U341F_nex1  | tcgtcggcagcgtcagatgtgtataagagacagNCCTACGGGDGGCWGCA        |
| U341F_nex2  | tcgtcggcagcgtcagatgtgtataagagacagNNCCTACGGGDGGCWGCA       |
| U341F_nex3  | tcgtcggcagcgtcagatgtgtataagagacagNNNCCTACGGGDGGCWGCA      |
| U806R_nex0  | gtctcgtgggctcggagatgtgtataagagacagGGACTIONVGGGTMTCTATTC   |
| U806R_nex1  | gtctcgtgggctcggagatgtgtataagagacagNNGACTIONVGGGTMTCTAATC  |
| U806R_nex2  | gtctcgtgggctcggagatgtgtataagagacagNNGACTIONVGGGTMTCTAATC  |
| U806R_nex3  | gtctcgtgggctcggagatgtgtataagagacagNNNGACTIONVGGGTMTCTAATC |

Lower case letters represent Illumina-specific overhang adapters, to which in a subsequent limited-cycle amplification step the sample specific indices and sequencing adapter attach. Frameshifting nucleotides are indicated in *cur*-sive, bold capital letters. The gene-specific sequences targeting 16S V3 and V4 region are shown in capital letters.

The clustering step detects and removes chimera sequences. In addition we also applied a reference based chimera removal step using the Green Genes database (version May 2013, <http://greengenes.secondgenome.com>).

The UPARSE-OTU workflow resulted in 352 OTUs. 98.7% of the reads could be successfully mapped back to OTU reference centroid sequences (usearch\_global; id = 97%). The OTUs were blasted (blastn [15]) against the GreenGenes database (v13\_5) [16] to assign taxonomic information with a bit-score cut-off of equal or bigger 100. Additionally, we checked taxonomic assignment of the best hit using MEGABLAST search against the NCBI nucleotide collection database The phylogenetic tree for the OTUs was built using PyNAST [17] and FastTree [18] as implemented in Qiime (v1.7) [19].

In total 178 OTUs were excluded because assigned taxonomy was either of non-bacterial origin, classified as mitochondria or chloroplast, unique to negative probes run in parallel through whole extraction and sequencing process, or unique to samples that do not belong to this data set, but were included in the previous data processing. Read counts for the same donor-recipient colony combinations were averaged (ESM Fig. S1B) and rounded, thus the final data set contained a total of 3'961'051

read counts mapping to 159 OTUs. The mean read count for the unique donor-recipient colony combinations was 127'776 (n = 31, SD = 58'551).

To show that achieved sequencing depth was adequate to reflect sample complexity we created rarefaction curves by randomly resampling the sequencing pool of each sample without replacement twenty times at different sampling depths. ESM Fig. S2A shows that the alpha diversity index (Shannon Index) of all samples reached the plateau well below the smallest library size (50'792 reads). ESM Fig. S2B plots sample richness (i.e. number of different OTUs discovered) at given subsampling depth and indicates that for most samples the majority of different OTUs were sampled.

### ESM.8) Statistical analyses of microbiota community composition

We performed statistical analyses on both the non-rarefied data set, as suggested by McMurdie & Holmes [20] and on data sets rarefied to the smallest library size for comparison. Rarefaction to the smallest library size was repeated a 100 times in order to evaluate chance effects of the sampling process. For all datasets, we defined "ecologically" common and rare OTUs.

**ESM Table S6: Taxonomic information for ecologically common OTUs**

| OTU     | Kingdom  | Phylum         | Class               | Order             | Family              | Genus            | Species |
|---------|----------|----------------|---------------------|-------------------|---------------------|------------------|---------|
| OTU_15  | Bacteria | OD1            | ZB2                 | NA                | NA                  | NA               | NA      |
| OTU_14  | Bacteria | Proteobacteria | Gammaproteobacteria | Pseudomonadales   | Pseudomonadaceae    | Pseudomonas      | NA      |
| OTU_19  | Bacteria | Proteobacteria | Betaproteobacteria  | Burkholderiales   | Oxalobacteraceae    | NA               | NA      |
| OTU_1   | Bacteria | Proteobacteria | Betaproteobacteria  | Neisseriales      | Neisseriaceae       | NA               | NA      |
| OTU_318 | Bacteria | Proteobacteria | Gammaproteobacteria | Pasteurellales    | NA                  | NA               | NA      |
| OTU_2   | Bacteria | Proteobacteria | Gammaproteobacteria | Pasteurellales    | NA                  | NA               | NA      |
| OTU_103 | Bacteria | Proteobacteria | Gammaproteobacteria | Pasteurellales    | NA                  | NA               | NA      |
| OTU_6   | Bacteria | Proteobacteria | Gammaproteobacteria | Pasteurellales    | NA                  | NA               | NA      |
| OTU_9   | Bacteria | Proteobacteria | Alphaproteobacteria | Rhizobiales       | Bartonellaceae      | NA               | NA      |
| OTU_16  | Bacteria | Proteobacteria | Alphaproteobacteria | Rhizobiales       | Bradyrhizobiaceae   | NA               | NA      |
| OTU_20  | Bacteria | Proteobacteria | Alphaproteobacteria | Rhizobiales       | Methylobacteriaceae | NA               | NA      |
| OTU_23  | Bacteria | Proteobacteria | Alphaproteobacteria | Rhizobiales       | Methylobacteriaceae | Methylobacterium | NA      |
| OTU_18  | Bacteria | Proteobacteria | Alphaproteobacteria | Caulobacterales   | Caulobacteraceae    | NA               | NA      |
| OTU_5   | Bacteria | Proteobacteria | Alphaproteobacteria | Sphingomonadales  | Sphingomonadaceae   | Sphingomonas     | NA      |
| OTU_11  | Bacteria | Actinobacteria | Actinobacteria      | Bifidobacteriales | Bifidobacteriaceae  | Bombiscardovia   | NA      |
| OTU_12  | Bacteria | Firmicutes     | Bacilli             | Lactobacillales   | Lactobacillaceae    | Lactobacillus    | NA      |
| OTU_3   | Bacteria | Firmicutes     | Bacilli             | Lactobacillales   | Lactobacillaceae    | Lactobacillus    | NA      |
| OTU_302 | Bacteria | Firmicutes     | Bacilli             | Lactobacillales   | Lactobacillaceae    | Lactobacillus    | NA      |
| OTU_44  | Bacteria | Firmicutes     | Bacilli             | Lactobacillales   | Lactobacillaceae    | Lactobacillus    | NA      |

**ESM Table S7: Taxonomic classification of the best hit of BLAST search against NCBI database for ecologically common OTUs.**

| OTU     | Kingdom         | Phylum                | Class                      | Order                    | Family                     | Genus                   | Species                               | Accession <sup>1</sup> | Bit score <sup>1</sup> | Identity % <sup>1</sup> | Source <sup>1,2</sup>                        |
|---------|-----------------|-----------------------|----------------------------|--------------------------|----------------------------|-------------------------|---------------------------------------|------------------------|------------------------|-------------------------|----------------------------------------------|
| OTU_15  |                 | uncultured bacterium  |                            |                          |                            |                         |                                       | JX222661.1             | 699                    | 98                      | NA                                           |
| OTU_14  | <b>Bacteria</b> | <b>Proteobacteria</b> | <b>Gammaproteobacteria</b> | <b>Pseudomonadales</b>   | <b>Pseudomonadaceae</b>    | <b>Pseudomonas</b>      | <i>Pseudomonas libanesis</i>          | KT382242               | 793                    | 100                     | compost                                      |
| OTU_19  | <b>Bacteria</b> | <b>Proteobacteria</b> | <b>Betaproteobacteria</b>  | <b>Burkholderiales</b>   | <b>Oxalobacteraceae</b>    | <b>Massilia</b>         | <i>Massilia suwonensis</i>            | LN774642               | 793                    | 100                     | air sample                                   |
| OTU_1   | <b>Bacteria</b> | <b>Proteobacteria</b> | <b>Betaproteobacteria</b>  | <b>Neisseriales</b>      | <b>Neisseriaceae</b>       | <b>Snodgrassella</b>    | <i>Snodgrassella alvi</i>             | JQ746646               | 793                    | 100                     | <i>Bombus bimaculatus</i> / bee gut          |
| OTU_318 | <b>Bacteria</b> | <b>Proteobacteria</b> | <b>Gammaproteobacteria</b> | <b>Pasteurellales</b>    | <b>Pasteurellaceae</b>     |                         |                                       | JQ363618               | 734                    | 100                     | <i>Pyrobombus hypnorum</i> / digestive tract |
| OTU_2   | <b>Bacteria</b> | <b>Proteobacteria</b> | <b>Gammaproteobacteria</b> | <b>Orbales</b>           | <b>Orbaceae</b>            | <b>Gilliamella</b>      | <i>Gilliamella apicola</i>            | JQ936676               | 793                    | 100                     | <i>Bombus vagans</i> / bee gut               |
| OTU_103 | <b>Bacteria</b> | <b>Proteobacteria</b> | <b>Gammaproteobacteria</b> | <b>Pasteurellales</b>    | <b>Pasteurellaceae</b>     |                         |                                       | JQ363618               | 760                    | 99                      | <i>Pyrobombus hypnorum</i> / digestive tract |
| OTU_6   | <b>Bacteria</b> | <b>Proteobacteria</b> | <b>Gammaproteobacteria</b> |                          |                            |                         |                                       | HM215025               | 793                    | 100                     | Bumblebee / gut                              |
| OTU_9   | <b>Bacteria</b> | <b>Proteobacteria</b> | <b>Alphaproteobacteria</b> | <b>Rhizobiales</b>       | <b>Bartonellaceae</b>      | <b>Bartonella</b>       | <i>Bartonella apis</i> sp. nov.       | KP987884               | 747                    | 100                     | <i>Bartonella apis</i>                       |
| OTU_16  | <b>Bacteria</b> | <b>Proteobacteria</b> | <b>Alphaproteobacteria</b> | <b>Rhizobiales</b>       | <b>Bradyrhizobiaceae</b>   | <b>Bradyrhizobium</b>   | <i>Bradyrhizobium erythrophlei</i>    | NR_135877              | 747                    | 100                     | <i>Erythrophloeum fordii</i>                 |
| OTU_20  | <b>Bacteria</b> | <b>Proteobacteria</b> | <b>Alphaproteobacteria</b> | <b>Rhizobiales</b>       | <b>Methylobacteriaceae</b> | <b>Methylobacterium</b> | <i>Methylobacterium aquaticum</i>     | AP014704               | 747                    | 100                     | <i>Methylobacterium aquaticum</i>            |
| OTU_23  | <b>Bacteria</b> | <b>Proteobacteria</b> | <b>Alphaproteobacteria</b> | <b>Rhizobiales</b>       | <b>Methylobacteriaceae</b> | <b>Methylobacterium</b> | <i>Methylobacterium oryzae</i> CBMB20 | CP003811               | 747                    | 100                     | Rice                                         |
| OTU_18  | <b>Bacteria</b> | <b>Proteobacteria</b> | <b>Alphaproteobacteria</b> | <b>Caulobacterales</b>   | <b>Caulobacteraceae</b>    | <b>Brevundimonas</b>    | <i>Brevundimonas</i> sp. ADMK76       | KU851032               | 747                    | 100                     | soil                                         |
| OTU_5   | <b>Bacteria</b> | <b>Proteobacteria</b> | <b>Alphaproteobacteria</b> | <b>Sphingomonadales</b>  | <b>Sphingomonadaceae</b>   | <b>Sphingomonas</b>     | <i>Sphingomonas</i> sp. Sph10         | KP866800               | 747                    | 100                     | membrane biofilm                             |
| OTU_11  | <b>Bacteria</b> | <b>Actinobacteria</b> | <b>Actinobacteria</b>      | <b>Bifidobacteriales</b> | <b>Bifidobacteriaceae</b>  | <b>Bifidobacterium</b>  |                                       | KC477410               | 756                    | 100                     | <i>Bombus terrestris</i> / gut               |
| OTU_12  | <b>Bacteria</b> | <b>Firmicutes</b>     | <b>Bacilli</b>             | <b>Lactobacillales</b>   | <b>Lactobacillaceae</b>    | <b>Lactobacillus</b>    | <i>Lactobacillus</i> sp. G5_12_5MO2   | KF600199               | 793                    | 100                     | <i>Apis mellifera</i> / hindgut              |
| OTU_3   | <b>Bacteria</b> | <b>Firmicutes</b>     | <b>Bacilli</b>             | <b>Lactobacillales</b>   | <b>Lactobacillaceae</b>    | <b>Lactobacillus</b>    | <i>Lactobacillus bombicola</i>        | LK054485               | 793                    | 100                     | Bumblebee / gut                              |
| OTU_302 | <b>Bacteria</b> | <b>Firmicutes</b>     | <b>Bacilli</b>             | <b>Lactobacillales</b>   | <b>Lactobacillaceae</b>    | <b>Lactobacillus</b>    | <i>Lactobacillus melliventris</i>     | KM068135               | 726                    | 97                      | <i>Apis mellifera</i> / digestive tract      |
| OTU_44  | <b>Bacteria</b> | <b>Firmicutes</b>     | <b>Bacilli</b>             | <b>Lactobacillales</b>   | <b>Lactobacillaceae</b>    | <b>Lactobacillus</b>    | <i>Lactobacillus apis</i>             | NR_125702              | 787                    | 99                      | <i>Apis mellifera</i> / digestive tract      |

Taxonomic classification in bold corroborates blastn results against the curated 16S GreenGenes database

<sup>1</sup>Top hit of the first one hundred BLASTN (2.3.1+) hits against NCBI nucleotide collection database (nr/nt; accessed 5 April 2016); given the same hit quality, preference was given to full length 16S sequences

<sup>2</sup>Indicates host and/or isolation source



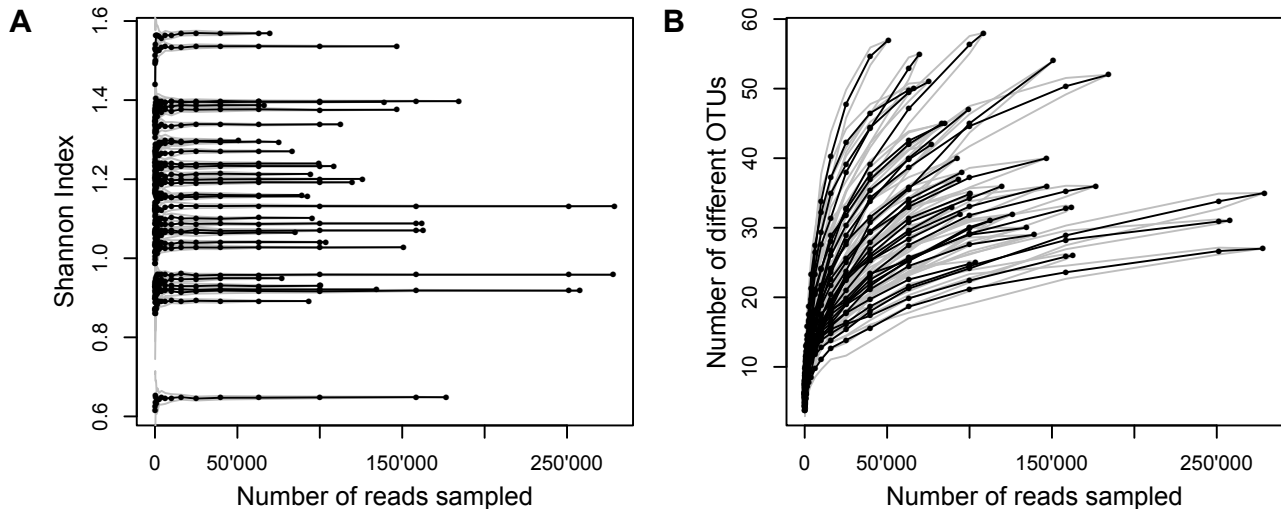

**ESM Fig. S2: Rarefaction curves each sample.** (A) shows the Shannon-Wiener diversity index, and (B) number of different OTUs (richness) at given sampling depth (x-axis). Lines connect means and SD (grey lines) of 20 independent draws at a given sampling depth for a given library.

Common OTUs were observed in at least 85% of the samples and the representative sequences are reported in ESM Table 8. We tested, similar to gene expression analysis, for effects of recipient and donor resistance phenotypes on the microbiota community structure.

To investigate potential effects of donor and/or recipient resistant phenotypes on the total proportion of reads defined as common OTUs, we fitted a generalized linear model (glm) with a quasibinomial error distribution using a logit link function to the count data. The model weights the proportions according to sample size, thus controlling for differences in sequencing depth. We performed backwards model selection (i.e. retaining only independent variables with a  $p$ -value  $\leq 0.1$ ) on the full model: recipient phenotype (resistant, susceptible) \* donor phenotype (resistant, susceptible), using F-tests to find the minimal adequate model.

To test for differential abundance of common OTUs, we fitted a negative binomial generalized linear model of the form: recipient phenotype (resistant, susceptible) \* donor phenotype (resistant, susceptible), as described in Love *et al.* [21] to the non-rarefied dataset. Briefly, the modelling pro-

cess statistically accounts for differences in sequencing depth, applies independent filtering to increase detection power, and uses Wald-tests to test for significant coefficients (i.e. log<sub>2</sub>-fold changes) in the negative binomial generalized linear model. We accounted for false discovery rate [8] at a cut-off of  $\alpha = 0.05$ .

We use linear discriminant analysis on regularized logarithm transformed count data to find the linear combination of common OTUs that best discriminates between phenotypes. Influential OTUs were identified based on partial correlation coefficients of the linear discriminant function and leave-one-out cross-validation (jack-knifed) assessed accuracy of phenotype discrimination by the discriminant function.

Complementary to the above analysis, we applied to each rarefied data set a negative binomial generalized linear model and performed backwards model selection from the initial full model: recipient phenotype (resistant, susceptible) \* donor phenotype (resistant, susceptible), using chi-square tests to identify the minimal adequate model for each common OTU within a rarefied data set. We accounted for false discovery rate [8] at a cut-off of  $\alpha = 0.05$  (ESM Fig. S3).

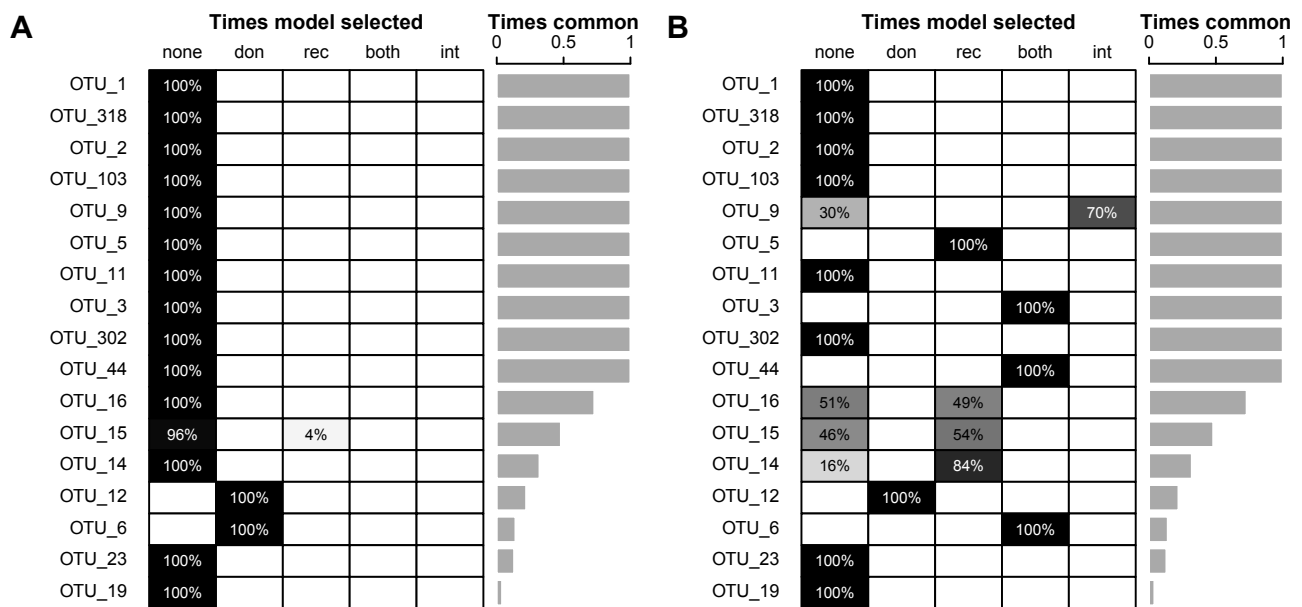

**ESM Fig. S3: Differential abundance in microbiota – analysis of rarefied data sets.** Panel (A) shows a result summary with correction for false discovery rate, panel (B) shows a result summary without correction. Shown are the percentage of times (grey-scaled) a particular model was selected when it explained significantly more variation with the addition of an explanatory variable (None = model with intercept only; don = model with donor main effect; rec = model with recipient main effect; both = donor and recipient main effects; int = full model with main effects and interaction). Grey bars to the right illustrate how often an OTU was defined as common OTU after the rarefaction process (1 = always common, 0 = never common, n=100).

## References:

- Schmid-Hempel, P. & Schmid-Hempel, R. 1993 Transmission of a pathogen in *Bombus terrestris*, with a note on division of labour in social insects. *Behav Ecol Sociobiol* **33**, 319–327. (doi:10.1007/BF00172930)
- Korner, P. & Schmid-Hempel, P. 2004 In vivo dynamics of an immune response in the bumble bee *Bombus terrestris*. *J Invertebr Pathol* **87**, 59–66. (doi:10.1016/j.jip.2004.07.004)
- Ulrich, Y., Sadd, B. M. & Schmid-Hempel, P. 2011 Strain filtering and transmission of a mixed infection in a social insect. *J Evol Biol* **24**, 354–362. (doi:10.1111/j.1420-9101.2010.02172.x)
- Schmid-Hempel, P. & Reber Funk, C. 2004 The distribution of genotypes of the trypanosome parasite, *Crithidia bombi*, in populations of its host, *Bombus terrestris*. *Parasitology* **129**, 147–158. (doi:10.1017/S0031182004005542)
- Koch, H. & Schmid-Hempel, P. 2011 Socially transmitted gut microbiota protect bumble bees against an intestinal parasite. *Proc Natl Acad Sci USA* **108**, 19288–19292. (doi:10.1073/pnas.1110474108)
- 1999 High-dose irradiation: wholesomeness of food irradiated with doses above 10 kGy. Report of a Joint FAO/IAEA/WHO Study Group. *World Health Organ Tech Rep Ser.* **890**, i–vi–1–197.
- Hellemans, J., Mortier, G., De Paepe, A., Speleman, F. & Vandesompele, J. 2007 qBase relative quantification framework and software for management and automated analysis of real-time quantitative PCR data. *Genome Biol* **8**, R19. (doi:10.1186/gb-2007-8-2-r19)
- Benjamini, Y. & Hochberg, Y. 1995 Controlling the false discovery rate: a practical and powerful approach to multiple testing. *J R Stat Soc Series B (Stat Methodol)* (doi:10.2307/2346101)
- Oksanen, J. et al. In press. *vegan: Community Ecology Package*. R package version 2.2-1.
- Liu, C. M., Aziz, M., Kachur, S., Hsueh, P.-R., Huang, Y.-T., Keim, P. & Price, L. B. 2011 BactQuant: an enhanced broad-coverage bacterial quantitative real-time PCR assay. *BMC Microbiol* **12**, 56–56. (doi:10.1186/1471-2180-12-56)
- Klindworth, A., Pruesse, E., Schweer, T., Peplies, J., Quast, C., Horn, M. & Glöckner, F. O. 2013 Evaluation of general 16S ribosomal RNA gene PCR primers for classical and next-generation sequencing.

- quencing-based diversity studies. *Nucleic Acids Res* **41**, e1–e1. (doi:10.1093/nar/gks808)
12. Lundberg, D. S., Yourstone, S., Mieczkowski, P., Jones, C. D. & Dangl, J. L. 2013 Practical innovations for high-throughput amplicon sequencing. *Nat Methods* **10**, 999–1002. (doi:10.1038/nmeth.2634)
13. Edgar, R. C. 2010 Search and clustering orders of magnitude faster than BLAST. *Bioinformatics* **26**, 2460–2461. (doi:10.1093/bioinformatics/btq461)
14. Edgar, R. C. 2013 UPARSE: highly accurate OTU sequences from microbial amplicon reads. *Nat Methods* **10**, 996–998. (doi:10.1038/nmeth.2604)
15. Altschul, S. F., Gish, W., Miller, W., Myers, E. W. & Lipman, D. J. 1990 Basic local alignment search tool. *J Mol Biol* **215**, 403–410. (doi:10.1016/S0022-2836(05)80360-2)
16. McDonald, D., Price, M. N., Goodrich, J., Nawrocki, E. P., DeSantis, T. Z., Probst, A., Andersen, G. L., Knight, R. & Hugenholtz, P. 2011 An improved Greengenes taxonomy with explicit ranks for ecological and evolutionary analyses of bacteria and archaea. *ISME J* **6**, 610–618. (doi:10.1038/ismej.2011.139)
17. Caporaso, J. G., Bittinger, K., Bushman, F. D., DeSantis, T. Z., Andersen, G. L. & Knight, R. 2010 PyNAST: a flexible tool for aligning sequences to a template alignment. *Bioinformatics* **26**, 266–267. (doi:10.1093/bioinformatics/btp636)
18. Price, M. N., Dehal, P. S. & Arkin, A. P. 2010 FastTree 2- Approximately maximum-likelihood trees for large alignments. *PLoS One* **5**. (doi:10.1371/journal.pone.0009490)
19. Caporaso, J. G. J. et al. 2010 QIIME allows analysis of high-throughput community sequencing data. *Nat Methods* **7**, 335–336. (doi:10.1038/nmeth.f.303)
20. McMurdie, P. J. & Holmes, S. 2014 Waste not, want not: why rarefying microbiome data is inadmissible. *PLoS Comput Biol* **10**, e1003531. (doi:10.1371/journal.pcbi.1003531)
21. Love, M. I., Huber, W. & Anders, S. 2014 Moderated estimation of fold change and dispersion for RNA-seq data with DESeq2. *Genome Biol* **15**, 550. (doi:10.1186/s13059-014-0550-8)
